**Table S1.** Ternary coordinates for *A. mississippiensis* gape study models.

[Click here to download Table S1](#)

**Table S2.** Ternary coordinates for *A. mississippiensis* ontogeny study models.

[Click here to download Table S2](#)

**Table S3.** Ternary coordinates for avian phylogeny proof of concept models.

[Click here to download Table S3](#)
